# Supplementary material for: Large-Scale Phylogenomic Analysis Reveals the Complex Evolutionary History of Rabies Virus in Multiple Carnivore Hosts
Source: PubMed Central journal article supplement (PMC5158080; doi:10.1371/journal.ppat.1006041), 2016-12-15

A

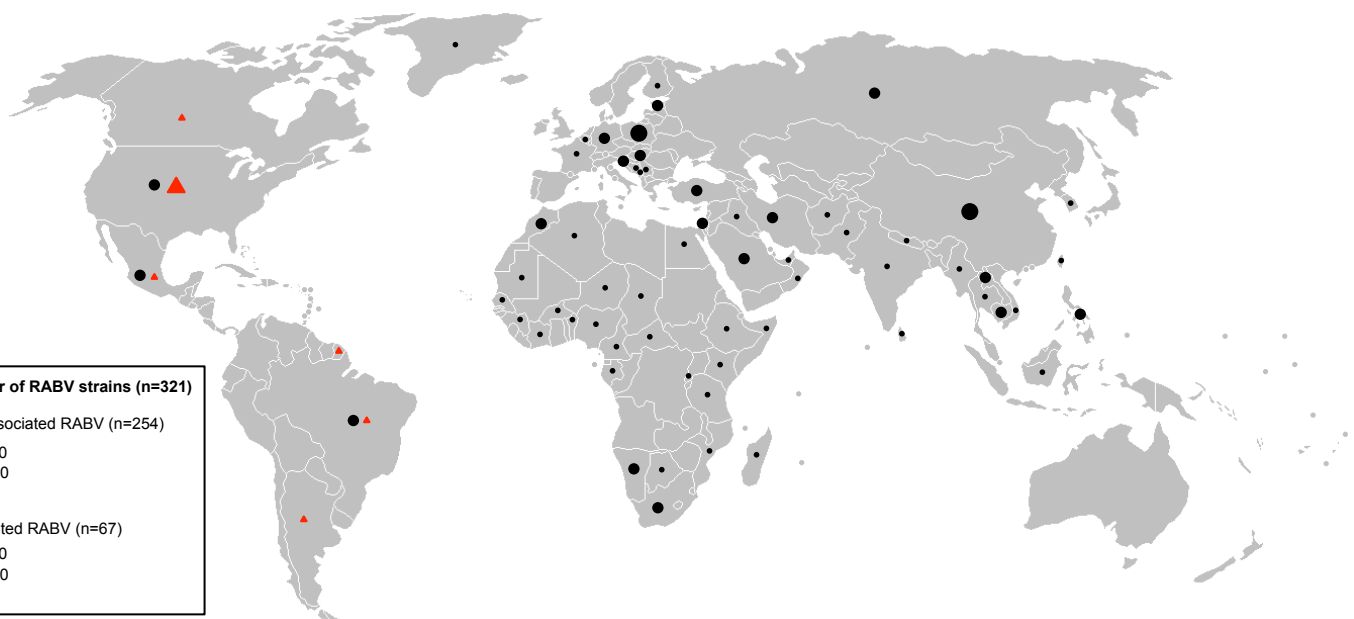

B

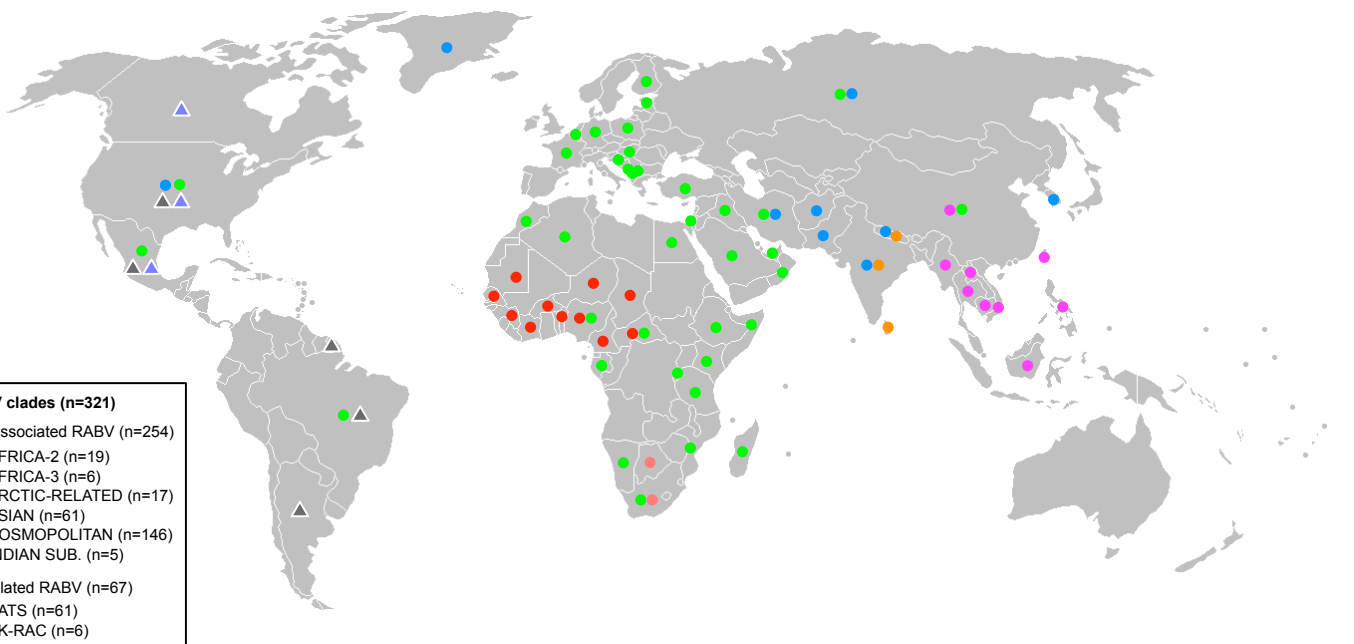

Supplement: ppat.1006041.s002.pdf [file ppat.1006041.s002.pdf]
